# Supplementary figures and images for: Influence of Dispersed TiO2 Nanoparticles via Steric Interaction on the Antifouling Performance of PVDF/TiO2 Composite Membranes
Source: MDPI journal article supplement (doi:10.3390/membranes12111118), 2022-11-09

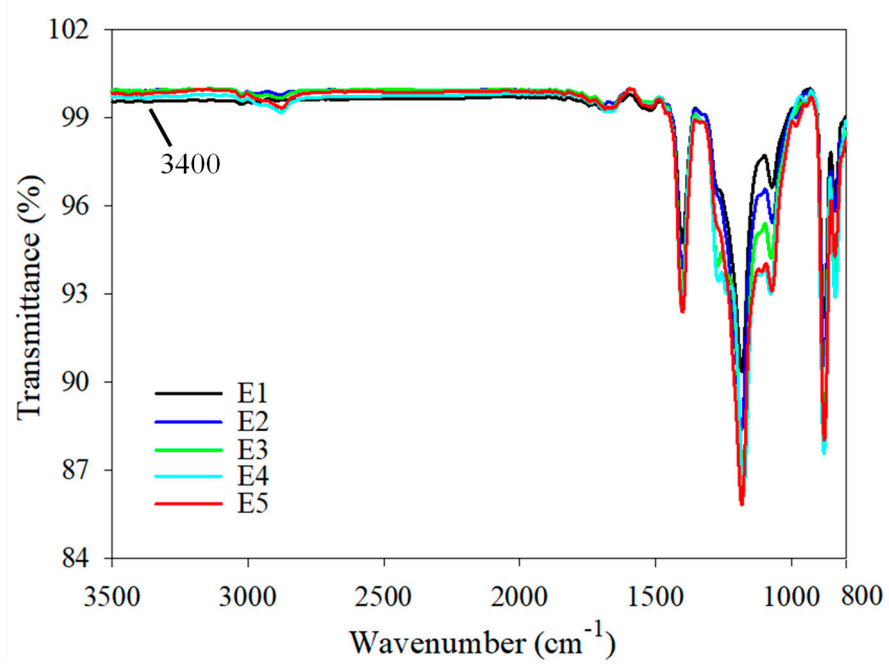

**Figure S1.** Full spectra of PVDF/TiO<sub>2</sub> composite membranes E1–E5 determined by ATR-FTIR.

Supplement: s1 [file s1]
